# Supplementary material for: BAD inactivation exacerbates rheumatoid arthritis pathology by promoting survival of sublining macrophages
Source: eLife. 2020 Dec 3;9:e56309. doi: 10.7554/eLife.56309 (PMC7714394; doi:10.7554/eLife.56309)
Supplement: Figure 1—figure supplement 1—source data 1. [file elife-56309-fig1-figsupp1-data1.xlsx]

## Sheet: Figure1-figure supplement 1A
TRAP staining of WT and Bad-/- mice in CIA
	WT(n=5)	Bad-/-(n=6)
	0.5	19
	3	31.5
	12	38
	6.5	23
	20.5	13.6667
		8.66667
Mean	8.5	22.3056
SD	7.97653	10.981
SEM	3.56721	4.48298
F-test	0.55538
T-test	0.0443206

## Sheet: Figure1-figure supplement 1B
mRNA expression levels
TRAP				Ctsk
	WT(n=7)	Bad-/-(n=9)			WT(n=7)	Bad-/-(n=9)
	0.652377	2.27846			0.885194	1.44605
	0.416223	1.21061			0.837201	1.48168
	1.45692	2.03938			1.17902	1.30852
	1	2.0514			0.906252	0.98576
	0.652717	1.89793			0.435422	1.47961
	0.847401	0.981919			0.940625	1.24828
	0.42391	0.801015			0.452284	0.519512
		1.459				1
		1.87789				2.22952
Mean	0.778507	1.62196		Mean	0.805142	1.29988
SD	0.36578	0.525676		SD	0.269876	0.467874
SEM	0.138252	0.175225		SEM	0.102004	0.155958
F-test	0.392395			F-test	0.19703
T-test	0.00285591			T-test	0.0263092

## Sheet: Figure 1-figure supplement 1C
TRAP staining of osteocalstogenesis in vitro
	WT					Mean	SD	F-test	T-test
M	2	2	0	1	1	1.2	0.83666
M+R	8	10	9	7	10	8.8	1.30384
	Bad-/-
M	1	0	1	1	2	1	0.707107	0.752315	0.6938
M+R	9	8	9	7	8	8.2	0.83666	0.411169	0.411694

## Sheet: Figure 1-figure supplement 1D
mRNA expression levels
TRAP							Ctsk
	WT	Bad-/-		WT	Bad-/-			WT	Bad-/-		WT	Bad-/-
M	0.759693	0.537879	M+R	1.31934	1.17335		M	0.00624885	0.00658626	M+R	2.13939	2.54653
M	0.467726	0.540806	M+R	1.36433	1.35702		M	0.00786042	0.00656197	M+R	1.81454	2.11271
M	0.623707	0.559342	M+R	1.35183	1.28518		M	0.00715443	0.00667412	M+R	1.98696	2.33962
Mean	0.617042	0.546009	Mean	1.34517	1.27185		Mean	0.0070879	0.00660745	Mean	1.9803	2.33295
SD	0.146098	0.0116394	SD	0.0232223	0.0925597		SD	0.000807842	5.89983e-05	SD	0.162528	0.216987
F-test		0.0126141	F-test		0.118437		F-test		0.0106107	F-test		0.7188
T-test		0.488603	T-test		0.254078		T-test		0.411285	T-test		0.0873504
