# Supplementary material for: BAD inactivation exacerbates rheumatoid arthritis pathology by promoting survival of sublining macrophages
Source: eLife. 2020 Dec 3;9:e56309. doi: 10.7554/eLife.56309 (PMC7714394; doi:10.7554/eLife.56309)
Supplement: Figure 1—source data 1. [file elife-56309-fig1-data1.xlsx]

## Sheet: Figure 1A
Incidence and clinical scores of WT and Bad-/- mice in CIA model
Day	WT (n = 12)												SCORE	SD	SEM	INCIDENCE(%)
15	0	0	0	0	0	0	0	0	0	0	0	0	0	0	0	0
19	0	0	0	0	0	0	0	0	0	0	0	0	0	0	0	0
19	0	0	0	0	0	0	0	0	0	0	0	0	0	0	0	0
21	0	0	0	0	0	0	0	0	0	0	0	0	0	0	0	0
23	0	0	0	0	0	0	0	0	0	0	0	0	0	0	0	0
25	0	0	0	0	2	0	0	0	0	0	0	0	0.166667	0.57735	0.166667	8.3
27	0	0	0	0	6	0	0	0	0	0	0	1	0.583333	1.72986	0.499368	16.67
29	0	0	0	0	6	0	0	0	0	0	0	4	0.833333	1.99241	0.575159	16.67
31	0	0	0	0	6	0	0	0	0	0	0	7	1.08333	2.53909	0.732972	16.67
33	0	0	0	0	6	0	0	0	1	0	0	7	1.16667	2.51661	0.726483	25
35	0	0	0	0	6	0	0	0	3	0	0	9	1.5	3	0.866025	25
37	0	0	0	0	6	0	0	0	3	0	0	9	1.5	3	0.866025	25
39	0	0	0	0	6	0	0	0	4	0	0	9	1.58333	3.05877	0.88299	25
41	0	0	0	0	6	0	0	0	5	1	0	9	1.75	3.10791	0.897176	33.33
43	0	0	0	0	6	0	0	0	5	2	0	9	1.83333	3.09936	0.894709	33.33
45	0	0	0	0	6	0	0	0	5	2	0	9	1.83333	3.09936	0.894709	33.33
47	0	0	0	0	6	4	0	0	3	2	0	9	2	2.98481	0.86164	41.7
49	0	0	0	0	9	8	0	0	3	2	0	9	2.58333	3.80092	1.09723	41.7
51	0	0	0	0	9	9	0	0	2	2	0	9	2.58333	3.94181	1.1379	41.7
53	0	0	0	0	9	9	0	0	2	2	0	9	2.58333	3.94181	1.1379	41.7
55	0	0	0	0	9	12	0	0	2	2	0	9	2.83333	4.44836	1.28413	41.7
57	0	0	0	0	9	12	0	0	2	2	0	9	2.83333	4.44836	1.28413	41.7
59	0	0	0	0	10	12	0	0	2	2	0	9	2.91667	4.58175	1.32264	41.7
61	0	0	0	0	12	12	0	0	2	1	0	9	3	4.9175	1.41956	41.7
63	0	0	0	0	12	12	0	0	2	1	0	9	3	4.9175	1.41956	41.7
Day	Bad-/- (n = 12)												SCORE	SD	SEM	INCIDENCE(%)	MWU-test
15	0	0	0	0	0	0	0	0	0	0	0	0	0	0	0	0
17	0	0	0	0	0	0	0	0	0	0	0	0	0	0	0	0
19	0	0	0	0	0	0	0	0	0	0	0	0	0	0	0	0
21	0	0	0	0	0	0	0	0	0	0	0	0	0	0	0	0
23	0	1	0	0	0	0	0	0	0	0	0	0	0.0833333	0.288675	0.0833333	8.3	0.74
25	6	5	0	0	1	0	0	0	0	4	0	2	1.5	2.23607	0.645497	41.7	0.16
27	9	10	0	0	2	0	3	0	3	10	0	4	3.41667	4.03301	1.16423	58.3	0.06
29	12	10	0	0	2	0	4	0	3	11	0	5	3.91667	4.62126	1.33404	58.3	0.078
31	12	10	0	0	3	0	5	0	6	12	0	6	4.5	4.77684	1.37895	58.3	0.089
33	12	12	0	0	3	0	5	0	6	12	0	7	4.75	5.0475	1.45709	58.3	0.101
35	12	12	0	0	3	0	6	0	6	12	0	9	5	5.16984	1.49241	58.3	0.101
37	12	12	0	0	3	0	6	0	6	12	0	9	5	5.16984	1.49241	58.3	0.101
39	12	12	0	0	3	0	6	1	9	12	2	9	5.5	5.05425	1.45904	75	0.028
41	12	12	0	0	3	0	6	3	9	12	4	9	5.83333	4.82104	1.39171	75	0.033
43	12	12	0	0	3	0	6	3	9	12	6	9	6	4.78634	1.3817	75	0.028
45	12	12	0	2	3	2	6	3	9	12	7	9	6.41667	4.37884	1.26406	91.7	0.005
47	12	12	0	3	3	3	6	3	10	12	7	9	6.66667	4.27112	1.23296	91.7	0.006
49	12	12	0	3	3	3	6	4	10	12	7	9	6.75	4.20227	1.21309	91.7	0.012
51	12	12	0	3	3	4	6	4	10	12	7	9	6.83333	4.13045	1.19236	91.7	0.01
53	12	12	0	3	3	4	6	5	10	12	6	9	6.83333	4.08619	1.17958	91.7	0.01
55	12	12	0	3	3	4	6	5	10	12	6	9	6.83333	4.08619	1.17958	91.7	0.017
57	12	12	0	2	3	4	6	5	10	12	6	9	6.75	4.18058	1.20683	91.7	0.02
59	12	12	0	2	2	4	6	5	10	12	6	9	6.66667	4.27112	1.23296	91.7	0.028
61	12	12	0	2	2	4	6	4	10	12	6	9	6.58333	4.31611	1.24595	91.7	0.033
63	12	12	0	2	2	4	6	4	10	12	5	9	6.5	4.33799	1.25227	91.7	0.033

## Sheet: Figure 1C
Evaluation of synovitis, pannus and erosion of ankle joints of WT and Bad-/- mice in CIA model
WT	WT (n = 12)												Mean	SD	SEM
synovitis	0	0	0	0	3	3	2	0	1	0	0	3	1	1.3484	0.389249
pannus fromation	0	0	0	0	3	3	0	0	0	0	0	2	0.666667	1.23091	0.355335
cartilage/bone destruction	0	0	0	0	3	2	0	0	1	0	0	3	0.75	1.21543	0.350865
Bad-/-	Bad-/- (n = 12)												Mean	SD	SEM	F-test	T-test
synovitis	3	3	3	2	0	4	3	2	2	1	3	3	2.41667	1.08362	0.312815	0.480163	0.00959477
pannus fromation	3	3	3	2	0	4	3	2	1	0	3	3	2.25	1.28806	0.37183	0.883055	0.00549386
cartilage/bone destruction	3	3	2	2	0	4	2	2	1	1	3	3	2.16667	1.11464	0.321769	0.779098	0.00697523

## Sheet: Figure 1E
Circulating levels of collagen II-specific antibodies in serum of WT and Bad-/- mice in CIA model
IgG				IgG1				IgG2b				IgG2c				IgG3
	WT	Bad-/-			WT	Bad-/-			WT	Bad-/-			WT	Bad-/-			WT	Bad-/-
n=12	0.3915	0.534		n=12	0.122	0.0835		n=12	0.4865	0.271		n=12	0.1305	0.1		n=12	0.433	0.16
	0.4175	0.333			-0.041	-0.019			0.0995	0.251			0.0575	0.0395			0.275	0.0815
	0.4565	0.7765			0.1415	0.437			0.1895	0.2145			0.0315	0.196			0.095	0.156
	0.125	0.316			-0.0315	0.0285			0.0015	0.058			0.0175	0.033			0	0.385
	0.212	0.579			0.0475	0.634			0.0875	0.3565			0.166	0.041			0.085	0.0645
	0.125	0.7425			-0.0375	0.0045			0.0395	0.294			0.029	0.1665			0.0305	0.1465
	0.586	0.619			0.16	0.366			-0.029	0.1255			0.167	0.204			0.516	0.4565
	0.112	0.4905			-0.046	0.23			-0.025	0.6955			-0.003	0.457			0.0345	0.527
	0.0735	0.831			-0.035	0.685			0.093	0.6465			-0.026	0.1095			0.054	0.142
	0.5415	0.318			0.035	0.697			0.535	0.0455			0.1395	0.022			0.0225	0.563
	0.318	0.6845			0.0635	1.144			0.156	0.4585			0.0365	0.2805			0.0395	0.306
	0.304	0.501			0.0075	0.25			0.039	0.5505			0.0515	0.51			0	0.6105
Mean	0.305208	0.560417		Mean	0.0321667	0.378375		Mean	0.139417	0.330583		Mean	0.0664583	0.179917		Mean	0.132083	0.299875
SD	0.17644	0.178778		SD	0.0757269	0.356269		SD	0.186026	0.217568		SD	0.0667766	0.163415		SD	0.176679	0.20021
SEM	0.050934	0.0516087		SEM	0.0218605	0.102846		SEM	0.0537012	0.0628066		SEM	0.0192767	0.0471738		SEM	0.0510029	0.0577958
F-test		0.965969		F-test		1.27836e-05		F-test		0.612297		F-test		0.00613652		F-test		0.685575
T-test		0.00193098		T-test		0.00643224		T-test		0.0304334		T-test		0.0422187		T-test		0.0405077

## Sheet: Figure 1F
mRNA expression levels
TNF-a				IL-6				IL-1b
	WT(n=6)	Bad-/-(n=9)			WT(n=6)	Bad-/-(n=9)			WT(n=6)	Bad-/-(n=9)
	1.70224	8.32197			0.292911	1			0.750899	5.16706
	0.536238	2.82605			0.12701	0.679178			4.24045	5.26736
	1.36528	0.659261			1.15418	2.24352			1.83793	3.61534
	1.44537	9.41445			0.157427	6.96192			0.676761	5.85443
	1	2.61305			0.0779344	0.371229			0.844791	7.09018
	0.968042	0.391652			0.566371	0.716869			1	6.12642
		1.94279				6.34027				17.4312
		2.50458				7.89668				19.0325
		12.4063				3.72716				8.3308
Mean	1.16953	4.56446		Mean	0.395972	3.32632		Mean	1.55847	8.65725
SD	0.416794	4.32645		SD	0.411079	3.01006		SD	1.37999	5.59626
SEM	0.170156	1.44215		SEM	0.167822	1.00335		SEM	0.56338	1.86542
F-test	7.20306e-05			F-test	0.000401445			F-test	0.00684193
T-test	0.046745			T-test	0.0193802			T-test	0.00499938
MMP-3				MMP-13				IL-10
	WT(n=6)	Bad-/-(n=9)			WT(n=6)	Bad-/-(n=9)			WT(n=6)	Bad-/-(n=9)
	0.153201	1.14841			0.871213	1.45602			1.50053	0.438715
	0.164333	2.06736			1.72638	4			1.11121	0.301806
	1.24404	2.6515			1	3.13087			1	0.299268
	0.277565	2.08011			1.68619	3.71863			0.511721	0.347163
	0.247598	1.45854			1.56772	1.9354			0.970655	0.22635
	0.224085	1			0.894419	2.52712			2.28654	0.56322
		1.38895				1.83152				0.462033
		3.93683				4.35926				0.546354
		1.71558				3.88236				0.140891
Mean	0.385137	1.93858		Mean	1.29099	2.98235		Mean	1.23011	0.369533
SD	0.423483	0.910042		SD	0.409997	1.07605		SD	0.606572	0.143582
SEM	0.172886	0.303347		SEM	0.167381	0.358684		SEM	0.247632	0.0478606
F-test	0.108728			F-test	0.0480078			F-test	0.0007467
T-test	0.000791934			T-test	0.00130663			T-test	0.0169571

## Sheet: Figure 1G
Protein levels of pro-inflammatory cytokines (ELISA)
TNFa				IL-6				IL-1b
	WT	Bad-/-			WT	Bad-/-			WT	Bad-/-
n=12	4.75	4.5		n=12	30.3571	4.10714		n=12	4.75	4.16667
	3.75	5.25			12.6786	2.5			2.5	3.33333
	5.75	6			17.1429	22.6786			3.88889	3.88889
	4	5.25			4.10714	18.5714			1.38889	3.05556
	5.25	6			3.03571	86.9643			2.77778	11.1111
	5.5	7.75			5.17857	9.10714			2.77778	3.88889
	6	10			6.78571	57.1429			3.33333	17.7778
	4.25	2.75			4.64286	8.57143			1.94444	3.88889
	3	3			5.53571	2.32143			5.55556	2.5
	3.25	4			1.96429	10.1786			2.5	4.44444
	4	8.75			0	41.9643			3.61111	11.6667
	3.25	9.75			6.96429	69.1071			4.72222	7.5
Mean	4.39583	6.08333		Mean	8.1994	27.7679		Mean	3.3125	6.43519
SD	1.03605	2.47793		SD	8.38247	29.0141		SD	1.2421	4.71082
SEM	0.299081	0.715318		SEM	2.41981	8.37564		SEM	0.358563	1.3599
F-test		0.00742725		F-test		0.000268098		F-test		0.000110547
T-test		0.0462161		T-test		0.0430984		T-test		0.0455277
