# Supplementary material for: BAD inactivation exacerbates rheumatoid arthritis pathology by promoting survival of sublining macrophages
Source: eLife. 2020 Dec 3;9:e56309. doi: 10.7554/eLife.56309 (PMC7714394; doi:10.7554/eLife.56309)
Supplement: Figure 2—source data 1. [file elife-56309-fig2-data1.xlsx]

## Sheet: Figure 2B
Quantification of the number of cleaved Casp-3 positive macrophage and total macrophage
CC3+F4/80				F4/80
	WT CIA (n=4)	Bad-/- CIA (n=6)			WT CIA (n=4)	Bad-/- CIA (n=6)
	10	5			38	56
	14	4			44	93
	13	10			42	79
	13	8			32	64
		7				61
		6				70
Mean	12.5	6.66667		Mean	39	70.5
SD	1.73205	2.16025		SD	5.2915	13.5757
SEM	0.866025	0.881917		SEM	2.64575	5.54226
F-test	0.76032			F-test	0.151824
T-test	0.00201503			T-test	0.00243605

## Sheet: Figure 2D
Apoptotic synovial macrophages analyzed by flow cytometry
	WT	Bad-/-
n=6	26.41	14.33
	24.11	11.4
	18.44	12.07
	23.98	11.72
	23.41	10.68
	22.83	12.5
Mean	23.1967	12.1167
SD	2.6298	1.24763
SEM	1.07361	0.509344
F-test	0.127388
T-test	2.98318e-05

## Sheet: Figure 2F
Apoptotic BMDMs analyzed by flow cytometry
		TNF+PS1145
		0h	4h	8h
WT	1	15	27.5	37.7
	2	17.7	30.2	42.4
	3	17.8	31.4	43.1
	Mean	16.8333	29.7	41.0667
	SD	1.5885	1.9975	2.93655
		TNF+PS1145
		0h	4h	8h
Bad-/-	1	18.9	21.7	22.7
	2	16.5	23.2	26.1
	3	18.8	23.4	25.6
	Mean	18.0667	22.7667	24.8
	SD	1.35769	0.929157	1.83576
	F-test	0.844275	0.355769	0.561979
	T-test	0.364446	0.00550256	0.00124185
