# Supplementary material for: BAD inactivation exacerbates rheumatoid arthritis pathology by promoting survival of sublining macrophages
Source: eLife. 2020 Dec 3;9:e56309. doi: 10.7554/eLife.56309 (PMC7714394; doi:10.7554/eLife.56309)
Supplement: Figure 2—source data 2. [file elife-56309-fig2-data2.xlsx]

## Sheet: Figure 2-figure supplement 1B
Macrophage percentages in synovium
F4/80/CD11b
	WT	Bad-/-
n=6	5.07	10.01
	4.81	8.16
	4.68	5.5
	2.1	7.13
	2.21	9.45
	3.25	7.57
Mean	3.68667	7.97
SD	1.34543	1.63429
SEM	0.54927	0.667198
F-test		0.679896
T-test		0.000573091

## Sheet: Figure 2-figure supplement 1D
B cell percentages in synovium
B220
	WT	Bad-/-
n=6	13.61	13.11
	7.93	11.56
	10.59	13.25
	10.92	16.49
	9.16	14.21
	6.07	17.1
Mean	9.71333	14.2867
SD	2.61415	2.12929
SEM	1.06722	0.869278
F-test		0.663515
T-test		0.00771404

## Sheet: Figure 2-figure supplement 1F
CD4 T cell percentages in synovium
CD4
	WT	Bad-/-
n=6	2.41	0.87
	1.91	2.86
	3.88	3.67
	4.33	3.27
	3.03	1.26
	1.11	1.81
Mean	2.77833	2.29
SD	1.21307	1.00967
SEM	0.495233	0.412195
F-test		0.743816
T-test		0.488852

## Sheet: Figure 2-figure supplement 1G
mRNA expression level
IFN-g				IL-4				IL-17				IL-21
	WT (n=6)	Bad-/- (n=9)			WT (n=6)	Bad-/- (n=9)			WT (n=6)	Bad-/- (n=9)			WT (n=6)	Bad-/- (n=9)
	0.0703402	1.12825			0.384054	0.265578			0.393296	0.572434			1.30425	0.984471
	1.16182	0.0524327			0.231122	2.68559			0.620364	1.36194			1.15267	1.49619
	1.83994	2.22225			1.39908	0.13861			0.952023	1.95506			0.746012	1.20376
	0.353921	0.414922			1	1.3266			0.909044	2.92601			0.605179	1.17594
	1.53249	0.155448			2.12235	1.54173			4.05316	0.609404			0.698772	1.3606
	1	4.35859			3.6411	5.8902			2.78874	0.624932			0.315193	1.22512
		0.140788				0.328377				1				1
		0.145344				0.12505				1.69283				1.4315
		4.557				0.741468				1.51944				2.43218
Mean	0.993085	1.46389		Mean	1.46295	1.44924		Mean	1.61944	1.36245		Mean	0.80368	1.36775
SD	0.677735	1.83467		SD	1.27114	1.86761		SD	1.46574	0.77429		SD	0.364615	0.435861
SEM	0.276684	0.611557		SEM	0.51894	0.622538		SEM	0.598386	0.258097		SEM	0.148853	0.145287
F-test	0.0420741			F-test	0.412282			F-test	0.107241			F-test	0.721861
T-test	0.497777			T-test	0.987766			T-test	0.705252			T-test	0.021558

## Sheet: Figure 2-figure supplement 2A
The ratio of B cell and T cell in spleen
B220				CD4
	WT	Bad-/-			WT	Bad-/-
n=6	41.84	43.14		n=6	10.47	10.44
	44.1	46.58			7.79	14.69
	47.17	52.7			12.91	11.91
	49.83	44.83			13.14	17.82
	48.85	47.77			11.59	19.24
	46.82	58.3			16.42	17.91
Mean	46.435	48.8867		Mean	12.0533	15.335
SD	2.98707	5.64271		SD	2.89414	3.58225
SEM	1.21947	2.30363		SEM	1.18153	1.46245
F-test		0.188945		F-test		0.6511
T-test		0.375845		T-test		0.111493

## Sheet: Figure 2-figure supplement 2B
The ratio of B cell and T cell in lymph node
B220				CD4
	WT	Bad-/-			WT	Bad-/-
n=6	75.91	74.44		n=6	14.39	14.78
	64.22	69.4			20.41	17.82
	71.34	78.11			16.53	13.81
	71.4	52.82			18.17	30.19
	75.72	71.42			16.1	20.4
	72.98	74.31			20.12	18.65
Mean	71.9283	70.0833		Mean	17.62	19.275
SD	4.27505	8.96157		SD	2.37773	5.88187
SEM	1.74528	3.65855		SEM	0.970704	2.40126
F-test		0.130017		F-test		0.0685855
T-test		0.662468		T-test		0.537193

## Sheet: Figure 2-figure supplement 3B
The percentage of B cell in the peripheral blood in uMT mice
	WT	Bad-/-
n=6	31.1	23.5
	19.2	18.5
	19.8	17.4
	21.3	14.9
	15.4	17.6
	14.3	11
Mean	20.1833	17.15
SD	5.98378	4.13025
SEM	2.44287	1.68617
F-test	0.435112
T-test	0.330909

## Sheet: Figure 2-figure supplement 3D
Incidence and clinical scores of uMT mice
Day	uMT/WT (n=16)																Score	SD	SEM	Incidence
15	0	0	0	0	0	0	0	0	0	0	0	0	0	0	0	0	0	0	0	0
17	0	0	0	0	0	0	0	0	0	0	0	0	0	0	0	0	0	0	0	0
19	0	0	0	0	0	0	0	0	0	0	0	0	0	0	0	0	0	0	0	0
21	0	0	0	0	0	0	0	0	0	0	0	0	0	0	0	0	0	0	0	0
23	0	0	0	0	0	0	0	0	0	0	0	0	0	0	0	0	0	0	0	0
25	0	0	0	0	0	0	0	0	0	0	0	0	0	0	0	0	0	0	0	0
27	0	0	0	0	0	0	0	0	0	1	0	0	0	0	1	0	0.125	0.341565	0.0853913	12.5
29	0	0	0	0	0	0	0	0	0	1	0	0	0	0	1	0	0.125	0.341565	0.0853913	12.5
31	0	0	0	0	1	0	0	0	0	0	0	0	1	0	1	0	0.1875	0.403113	0.100778	18.75
33	0	0	0	0	1	0	0	0	0	1	0	0	2	0	1	0	0.3125	0.60208	0.15052	25
35	0	1	0	0	2	0	0	0	0	1	0	0	4	0	0	0	0.5	1.09545	0.273861	25
37	0	1	0	0	2	0	0	0	0	1	0	0	7	0	1	0	0.75	1.77012	0.442531	31.25
39	0	1	0	0	2	0	0	0	1	1	0	0	7	0	0	1	0.8125	1.7595	0.439875	37.5
41	0	2	0	0	3	1	0	0	1	1	0	0	7	0	0	1	1	1.82574	0.456435	43.75
43	0	2	0	0	3	1	0	0	2	1	0	0	7	0	0	1	1.0625	1.84278	0.460695	43.75
45	0	2	0	0	3	1	0	0	2	1	0	0	7	0	0	0	1	1.8619	0.465475	37.5
47	0	2	0	0	3	1	0	0	3	1	0	0	7	0	0	0	1.0625	1.91377	0.478441	37.5
49	0	2	0	0	2	1	0	0	3	1	0	0	7	0	0	0	1	1.8619	0.465475	37.5
51	0	2	0	0	2	1	0	0	3	1	0	0	7	0	0	0	1	1.8619	0.465475	37.5
53	0	2	0	0	1	0	0	0	3	1	0	0	7	0	0	0	0.875	1.85742	0.464354	31.25
55	0	2	0	0	1	0	0	0	3	1	0	0	7	0	0	0	0.875	1.85742	0.464354	31.25
57	0	1	0	0	1	0	0	0	3	0	0	0	7	0	0	0	0.75	1.84391	0.460977	25
59	0	1	0	0	1	0	0	0	3	0	0	0	7	0	0	0	0.75	1.84391	0.460977	25
61	0	1	0	0	1	0	0	0	3	0	0	0	7	0	0	0	0.75	1.84391	0.460977	25
63	0	1	0	0	1	0	0	0	3	0	0	0	7	0	0	0	0.75	1.84391	0.460977	25
Day	uMT/Bad-/- (n=16)																Score	SD	SEM	Incidence
15	0	0	0	0	0	0	0	0	0	0	0	0	0	0	0	0	0	0	0	0
17	0	0	0	0	0	0	0	0	0	0	0	0	0	0	0	0	0	0	0	0
19	0	0	0	0	0	0	0	0	0	0	0	0	0	0	0	0	0	0	0	0
21	0	0	0	0	0	0	0	0	0	0	0	0	0	0	0	0	0	0	0	0
23	0	0	0	0	0	0	0	0	0	0	0	0	0	0	0	0	0	0	0	0
25	0	0	0	0	0	0	0	0	0	0	0	0	0	0	1	0	0.0625	0.25	0.0625	6.25	ns
27	0	0	0	0	0	0	0	0	0	0	0	1	0	0	2	0	0.1875	0.543906	0.135976	12.5	ns
29	0	0	1	0	0	0	0	0	0	0	0	1	0	0	3	0	0.3125	0.7932	0.1983	18.75	ns
31	0	0	2	0	0	0	0	0	1	0	0	1	0	0	3	0	0.4375	0.892095	0.223024	25	ns
33	0	0	2	0	0	0	0	0	1	0	0	1	0	0	3	0	0.4375	0.892095	0.223024	25	ns
35	0	0	2	1	0	0	0	0	1	0	0	0	0	0	3	0	0.4375	0.892095	0.223024	25	ns
37	0	0	2	1	0	2	0	0	1	0	0	0	0	0	6	0	0.75	1.57056	0.392641	31.25	ns
39	0	0	3	1	0	2	0	0	2	0	0	0	0	0	6	0	0.875	1.66833	0.417083	31.25	ns
41	0	0	3	1	0	2	0	0	2	0	0	0	0	0	6	0	0.875	1.66833	0.417083	31.25	ns
43	0	0	3	1	0	2	0	0	2	0	0	0	0	0	6	0	0.875	1.66833	0.417083	31.25	ns
45	0	0	3	1	0	2	0	0	3	0	0	0	0	0	6	0	0.9375	1.73085	0.432712	31.25	ns
47	0	0	4	1	0	2	0	0	3	0	0	0	0	0	6	0	1	1.82574	0.456435	31.25	ns
49	0	0	4	1	0	2	0	0	3	0	0	0	0	0	6	0	1	1.82574	0.456435	31.25	ns
51	0	0	3	0	0	2	0	0	3	0	0	0	0	0	6	0	0.875	1.74642	0.436606	25	ns
53	0	0	3	0	0	2	0	0	3	1	0	0	0	0	6	0	0.9375	1.73085	0.432712	31.25	ns
55	0	0	3	0	0	2	0	0	3	1	0	0	0	0	6	0	0.9375	1.73085	0.432712	31.25	ns
57	0	0	2	0	0	2	0	0	2	1	0	0	0	0	6	0	0.8125	1.60078	0.400195	31.25	ns
59	0	0	2	0	0	2	0	0	2	1	0	0	0	0	6	0	0.8125	1.60078	0.400195	31.25	ns
61	0	0	2	0	0	2	0	0	3	1	0	0	0	0	6	0	0.875	1.66833	0.417083	31.25	ns
63	0	0	2	0	0	2	0	0	3	1	0	0	0	0	6	0	0.875	1.66833	0.417083	31.25	ns

## Sheet: Figure 2-figure supplement 3F
Evaluation of synovitis, pannus and erosion of ankle joints
uMT/WT (n=12)	uMT/WT (n=12)												Mean	SD	SEM
Synovitis	2	0	0	0	1	1	0	1	2	0	0	0	0.583333	0.792961	0.228908
Ppannus fromation	1	0	0	0	1	1	0	0	2	0	0	0	0.416667	0.668558	0.192996
Cartilage/bone destruction	1	0	0	0	1	1	0	0	2	0	0	0	0.416667	0.668558	0.192996
uMT/Bad-/- (n=12)	uMT/Bad-/- (n=12)												Mean	SD	SEM	F-test	T-test
Synovitis	0	0	0	0	3	1	0	1	0	0	2	0	0.583333	0.996205	0.28758	0.461304	1
Pannus fromation	0	0	0	0	2	0	0	1	0	0	2	0	0.416667	0.792961	0.228908	0.58096	1
Cartilage/bone destruction	0	0	0	0	2	0	0	1	0	0	2	0	0.416667	0.792961	0.228908	0.58096	1

## Sheet: Figure 2-figure supplement 3G
Anti-dsDNA IgG levels in the serum
	WT (n=6)	Bad-/- (n=5)
x1000	3.33871	9.04476
	8.72537	4.34556
	7.33263	7.69061
	4.02569	2.79614
	6.85883	9.3226
	3.81069
Mean	5.68199	6.63994
SD	2.24088	2.92073
SEM	0.914837	1.30619
F-test	0.570981
T-test	0.552728

[truncated: 11 more sheets: Figure 2-figure supplemant 4B, Figure 2-figure supplemant 4C, Figure 2-figure supplemant 4D, Figure 2-figure supplemant 4E, Figure 2-figure supplement 5B, Figure 2-figure supplement 6B, Figure 2-figure supplement 6D, Figure 2-figure supplement 6F, Figure 2-figure supplement 7B, Figure 2-figure supplement 7D, Figure 2-figure supplement 7F]
