# Supplementary material for: BAD inactivation exacerbates rheumatoid arthritis pathology by promoting survival of sublining macrophages
Source: eLife. 2020 Dec 3;9:e56309. doi: 10.7554/eLife.56309 (PMC7714394; doi:10.7554/eLife.56309)
Supplement: Figure 3—figure supplement 1—source data 1. [file elife-56309-fig3-figsupp1-data1.xlsx]

## Sheet: Figure 3-figure supplement 1A
The percentage of overall CD45.2 cells in the peripheral blood (4 weeks after transplantation) of CD45.1:WT and CD45.1:Bad-/- mice was analyzed by flow cytometry
	CD45.2-APCCy7 (n=5 per group)					Mean	SD	SEM	F-test	T-test
CD45.1:WT	80.2	77.5	80.7	93	81.4	82.56	6.02022	2.69232	0.562689	0.573352
CD45.1:Bad-/-	81.7	82.9	85.5	79	73.9	80.6	4.41475	1.97434

## Sheet: Figure 3-figure supplement 1B
The percentage of overall CD45.2 cells in the peripheral blood (8 weeks after transplantation) of CD45.1:WT and CD45.1:Bad-/- mice was analyzed by flow cytometry
	CD45.2-FITC (n=5 per group)					Mean	SD	SEM	F-test	T-test
CD45.1:WT	83.5	84.9	97.8	98.2	91.4	91.16	6.92048	3.09493	0.246493	0.428692
CD45.1:Bad-/-	93.5	87.7	89.2	87.5	83.3	88.24	3.66851	1.64061

## Sheet: Figure 3-figure supplement 1C
The percentage of CD45.2 myeloid cells (gated by Mac1 and Gr1) in the peripheral blood (4 weeks after transplantation) of CD45.1:WT and CD45.1:Bad-/- mice was analyzed by flow cytometry
	CD45.2-APCCy7 in gated Mac1 and Gr1 (n=5 per group)					Mean	SD	SEM	F-test	T-test
CD45.1:WT	98.4	98.7	99.4	98.9	99.2	98.92	0.396232	0.1772	0.566862	0.563836
CD45.1:Bad-/-	99.4	99.6	99.1	99.2	98.2	99.1	0.538516	0.240832
