# Supplementary material for: BAD inactivation exacerbates rheumatoid arthritis pathology by promoting survival of sublining macrophages
Source: eLife. 2020 Dec 3;9:e56309. doi: 10.7554/eLife.56309 (PMC7714394; doi:10.7554/eLife.56309)
Supplement: Figure 3—source data 1. [file elife-56309-fig3-data1.xlsx]

## Sheet: Figure 3C
Incidence and clinical scores of CD45.1:WT and CD45.1:Bad-/- mice in CIA model 58 13) and Bad3SA/3SA mice in CIA model
Day	CD45.1:WT (n=15)																	Score	SD	SEM	Incidence
15	0	0	0	0	0	0	0	0	0	0	0	0	0	0	0			0	0	0	0
17	0	0	0	0	0	0	0	0	0	0	0	0	0	0	0			0	0	0	0
19	0	0	0	0	0	0	0	0	0	0	0	0	0	0	0			0	0	0	0
21	0	0	0	0	0	0	0	0	0	0	0	0	0	0	0			0	0	0	0
23	0	0	0	0	0	0	0	0	0	0	0	0	0	0	0			0	0	0	0
25	0	0	0	0	0	0	0	0	0	0	0	0	0	0	0			0	0	0	0
27	0	0	0	0	0	0	0	0	0	0	0	0	0	0	0			0	0	0	0
29	0	0	0	0	0	0	0	0	0	1	0	0	0	1	0			0.133333	0.351866	0.0908514	13.3
31	0	0	0	0	1	0	0	0	0	1	0	0	0	2	0			0.266667	0.593617	0.153271	20
33	0	0	0	0	1	0	0	0	0	1	0	1	0	3	0			0.4	0.828079	0.213809	26.7
35	0	0	0	0	1	0	0	0	0	1	0	1	0	3	0			0.4	0.828079	0.213809	26.7
37	0	0	0	0	1	0	0	0	0	0	0	1	0	3	0			0.333333	0.816497	0.210819	20
39	0	0	0	0	1	0	0	0	0	0	0	1	0	3	0			0.333333	0.816497	0.210819	20
41	0	0	0	0	0	0	0	0	0	0	0	1	0	2	0			0.2	0.560612	0.144749	13.3
43	0	0	0	0	0	0	0	0	0	0	0	0	0	2	0			0.133333	0.516398	0.133333	6.7
45	0	0	0	0	0	0	0	0	0	0	0	0	0	2	0			0.133333	0.516398	0.133333	6.7
47	0	0	0	0	0	0	0	0	0	0	0	0	0	2	0			0.133333	0.516398	0.133333	6.7
49	0	0	0	0	0	0	0	0	0	0	0	0	0	2	0			0.133333	0.516398	0.133333	6.7
51	0	0	0	0	0	0	0	0	0	0	0	0	0	2	0			0.133333	0.516398	0.133333	6.7
53	0	0	0	0	0	0	0	0	0	0	0	0	0	2	0			0.133333	0.516398	0.133333	6.7
55	0	0	0	0	0	0	0	0	0	0	0	0	0	2	0			0.133333	0.516398	0.133333	6.7
57	0	0	0	0	0	0	0	0	0	0	0	0	0	2	0			0.133333	0.516398	0.133333	6.7
59	0	0	0	0	0	0	0	0	0	0	0	0	0	2	0			0.133333	0.516398	0.133333	6.7
61	0	0	0	0	0	0	0	0	0	0	0	0	0	2	0			0.133333	0.516398	0.133333	6.7
63	0	0	0	0	0	0	0	0	0	0	0	0	0	2	0			0.133333	0.516398	0.133333	6.7
Day	CD45.1:Bad-/- (n=17)																	Score	SD	SEM	Incidence	MWU-test
15	0	0	0	0	0	0	0	0	0	0	0	0	0	0	0	0	0	0	0	0	0
17	0	0	0	0	0	0	0	0	0	0	0	0	0	0	0	0	0	0	0	0	0
19	0	0	0	0	0	0	0	0	0	0	0	0	0	0	0	0	0	0	0	0	0
21	0	0	0	0	0	0	0	0	0	0	0	0	0	0	0	0	0	0	0	0	0
23	0	0	0	0	0	0	0	0	0	0	0	0	0	0	0	0	0	0	0	0	0
25	0	0	0	0	0	0	0	0	0	0	0	0	0	0	0	0	0	0	0	0	0
27	0	0	0	0	0	0	0	0	0	0	2	0	0	1	0	0	0	0.176471	0.528594	0.128203	11.76
29	0	0	0	0	1	1	0	1	0	0	2	0	0	1	0	1	0	0.411765	0.618347	0.149971	35.3
31	0	0	0	0	3	2	0	1	0	0	2	0	0	1	1	4	0	0.823529	1.23669	0.299942	41.2
33	0	0	0	0	3	2	0	1	0	0	2	0	0	1	1	5	0	0.882353	1.409	0.341734	41.2	0.411
35	0	0	0	0	6	1	0	0	0	0	2	1	0	1	1	5	0	1	1.80278	0.437237	41.2	0.433
37	0	0	0	2	7	1	0	0	0	0	2	1	0	1	1	6	0	1.23529	2.10741	0.511122	47	0.176
39	0	0	0	2	8	1	0	0	0	1	1	1	0	1	1	6	0	1.29412	2.25734	0.547486	52.9	0.114
41	0	0	1	2	8	1	0	0	0	1	1	1	0	1	1	6	0	1.35294	2.23442	0.541927	58.8	0.03
43	0	0	1	2	8	1	0	0	0	1	1	1	0	1	1	6	0	1.35294	2.23442	0.541927	58.8	0.014
45	0	0	1	2	8	1	0	0	0	0	1	1	0	1	1	6	0	1.29412	2.25734	0.547486	52.9	0.03
47	0	0	1	2	9	1	0	0	0	0	1	1	0	1	1	6	0	1.35294	2.44799	0.593724	52.9	0.03
49	0	0	1	2	9	1	0	0	0	0	1	1	0	1	1	6	0	1.35294	2.44799	0.593724	52.9	0.03
51	0	0	0	2	9	1	0	0	0	0	1	1	0	1	1	5	0	1.23529	2.35927	0.572208	47	0.058
53	0	0	0	2	9	0	0	0	0	0	1	1	0	1	1	5	0	1.17647	2.3779	0.576726	41.2	0.058
55	0	0	0	2	9	0	0	0	0	0	1	1	0	1	1	5	0	1.17647	2.3779	0.576726	41.2	0.058
57	0	0	0	2	9	0	0	0	0	0	1	1	0	1	1	5	0	1.17647	2.3779	0.576726	41.2	0.058
59	0	0	0	1	9	0	0	0	0	0	1	1	0	1	0	4	0	1	2.29129	0.555719	35.3	0.058
61	0	0	0	1	9	0	0	0	0	0	1	1	0	1	0	4	0	1	2.29129	0.555719	35.3	0.058
63	0	0	0	1	9	0	0	0	0	0	1	1	0	1	0	4	0	1	2.29129	0.555719	35.3	0.058

## Sheet: Figure 3E
Evaluation of synovitis, pannus and erosion of ankle joints from CD45.1:WT and CD45.1:Bad-/- mice in CIA model
CD45.1:WT (n=15)																		Mean	SD	SEM
synovitis	0	0	0	0	1	0	0	0	0	0	0	1	0	0	0			0.133333	0.351866	0.0908514
pannus fromation	0	0	0	0	1	0	0	0	0	0	0	0	0	0	0			0.0666667	0.258199	0.0666667
cartilage/bone destruction	0	0	0	0	1	0	0	0	0	0	0	0	0	0	0			0.0666667	0.258199	0.0666667
CD45.1:Bad-/- (n=17)																		Mean	SD	SEM	F-test	T-test
synovitis	0	0	1	1	2	0	0	0	0	1	1	1	0	1	0	2	1	0.647059	0.701888	0.170233	0.0129239	0.0135849
pannus fromation	0	0	1	1	2	0	0	0	0	0	1	1	0	1	0	2	0	0.529412	0.71743	0.174002	0.00040599	0.0217453
cartilage/bone destruction	0	0	1	1	2	0	0	0	0	0	1	1	0	0	0	2	0	0.470588	0.71743	0.174002	0.00040599	0.0420928

## Sheet: Figure 3G
Quantification of the number of total macrophage and cleaved Casp-3 positive macrophage per field in the ankle joint sections of CD45.1:WT and CD45.1:Bad-/- mice in CIA model
Cleaved casp-3/F4/80 double positive cells				F4/80 positive cells
	CD45.1:WT (n=7)	CD45.1:Bad-/- (n=9)			CD45.1:WT (n=7)	CD45.1:Bad-/- (n=9)
	6	4			22	41
	9	4			18	39
	10	3			38	47
	8	10			34	28
	15	3			21	60
	6	7			23	59
	11	5			24	35
		4				54
		3				42
Mean	9.28571	4.77778		Mean	25.7143	45
SD	3.14718	2.33333		SD	7.36465	10.9316
SEM	1.18952	0.777778		SEM	2.78358	3.64387
F-test		0.424796		F-test		0.351488
T-test		0.00528197		T-test		0.00131598
