# Supplementary material for: BAD inactivation exacerbates rheumatoid arthritis pathology by promoting survival of sublining macrophages
Source: eLife. 2020 Dec 3;9:e56309. doi: 10.7554/eLife.56309 (PMC7714394; doi:10.7554/eLife.56309)
Supplement: Figure 4—source data 1. [file elife-56309-fig4-data1.xlsx]

## Sheet: Figure 4C
Quantification of pBAD(S136)-positive cells per field in the synovium of CIA mice
	Control	Arthritic joints
n=4 per group	3	27
	2	21
	3	27
	2	28
Mean	2.5	25.75
SD	0.57735	3.20156
SEM	0.288675	1.60078
F-test		0.0187982
T-test		0.000528209

## Sheet: Figure 4E
Quantification of the percentage of pBAD(S136)-positive cells in total cells per field of different cell types in CIA model
		Total cells	p-BAD+ cells	Ratio	%
F480+ cells (n=3 per group)	1	43	38	0.883721	88.3721
	2	24	21	0.875	87.5
	3	25	18	0.72	72
		Total cells	p-BAD+ cells	Ratio	%
CD45R+ cells (n=3 per group)	1	62	3	0.0483871	4.83871
	2	56	4	0.0714286	7.14286
	3	18	7	0.388889	38.8889
		Total cells	p-BAD+ cells	Ratio	%
CD3+ cells (n=3 per group)	1	24	9	0.375	37.5
	2	38	4	0.105263	10.5263
	3	19	6	0.315789	31.5789
		Total cells	p-BAD+ cells	Ratio	%
Vimen+ cells (n=3 per group)	1	36	3	0.0833333	8.33333
	2	52	3	0.0576923	5.76923
	3	47	9	0.191489	19.1489
