# Supplementary material for: BAD inactivation exacerbates rheumatoid arthritis pathology by promoting survival of sublining macrophages
Source: eLife. 2020 Dec 3;9:e56309. doi: 10.7554/eLife.56309 (PMC7714394; doi:10.7554/eLife.56309)
Supplement: Figure 4—source data 2. [file elife-56309-fig4-data2.xlsx]

## Sheet: Figure 4-figure supplement 1B
Double staining of BAD and cell markers in arthritic joints in CIA
	Total cell number	BAD+ cell number	% of BAD+ cell
CD3	19	17	89.4737
	29	25	86.2069
	31	29	93.5484
		mean	89.743
CD45R	25	24	96
	23	22	95.6522
	23	20	86.9565
		mean	92.8696
F4/80	32	29	90.625
	28	24	85.7143
	46	43	93.4783
		mean	89.9392
Vimentin	30	28	93.3333
	69	67	97.1014
	64	59	92.1875
		mean	94.2074

## Sheet: Figure 4-figure supplement 2B
Double staining of pBAD with synovial cell markers in non-arthritic mice in CIA
	Total cell number	pBAD+ cell number	% of pBAD+ cell
CD3	4	1	25
	3	0	0
	2	0	0
		mean	8.33333
CD45R	2	0	0
	8	1	12.5
	3	0	0
		mean	4.16667
F4/80	6	1	16.6667
	8	0	0
	8	2	25
		mean	13.8889
Vimentin	5	1	20
	8	1	12.5
	9	1	11.1111
		mean	14.537
