# Supplementary material for: BAD inactivation exacerbates rheumatoid arthritis pathology by promoting survival of sublining macrophages
Source: eLife. 2020 Dec 3;9:e56309. doi: 10.7554/eLife.56309 (PMC7714394; doi:10.7554/eLife.56309)
Supplement: Figure 5—source data 1. [file elife-56309-fig5-data1.xlsx]

## Sheet: Figure 5C
Quantification of the number of pAkt and F4/80 double positive cells per field in the synovium of WT control and arthritic mice in CIA model
	Control	Arthritic joints
n=4 per group	6	25
	4	28
	7	29
	4	19
Mean	5.25	25.25
SD	1.5	4.5
SEM	0.75	2.25
F-test		0.104088
T-test		0.000151723

## Sheet: Figure 5D
Quantification of the number of pIKK and F4/80 double positive cells per field in the synovium of WT control and arthritic mice in CIA model
	Control	Arthritic joints
n=4 per group	6	32
	2	16
	8	22
	4	25
Mean	5	23.75
SD	2.58199	6.65207
SEM	1.29099	3.32603
F-test		0.154387
T-test		0.00190994
