# Supplementary material for: BAD inactivation exacerbates rheumatoid arthritis pathology by promoting survival of sublining macrophages
Source: eLife. 2020 Dec 3;9:e56309. doi: 10.7554/eLife.56309 (PMC7714394; doi:10.7554/eLife.56309)
Supplement: Figure 6—figure supplement 1—source data 1. [file elife-56309-fig6-figsupp1-data1.xlsx]

## Sheet: Figure 6-figure supplement 1B
Quantification of the number of cleaved Casp-3 positive macrophage and total macrophage per field in the ankle joint sections of TNF-Tg and TNF-Tg/Bad-/- mice
Cleaved casp-3/F4/80 double positive cells						F4/80 positive cells
		TNF-Tg	TNF-Tg/Bad-/-				TNF-Tg	TNF-Tg/Bad-/-
	n=4 per group	17	13			n=4 per group	89	101
		24	6				90	112
		25	9				77	119
		14	5				96	125
	Mean	20	8.25			Mean	88	114.25
	SD	5.35413	3.59398			SD	7.95822	10.3078
	SEM	2.67706	1.79699			SEM	3.97911	5.15388
	F-test		0.529543			F-test		0.681253
	T-test		0.01078			T-test		0.00686851
