# Supplementary material for: BAD inactivation exacerbates rheumatoid arthritis pathology by promoting survival of sublining macrophages
Source: eLife. 2020 Dec 3;9:e56309. doi: 10.7554/eLife.56309 (PMC7714394; doi:10.7554/eLife.56309)
Supplement: Figure 6—source data 1. [file elife-56309-fig6-data1.xlsx]

## Sheet: Figure 6B
Evaluation of synovitis, pannus and erosion of ankle joints of TNF-Tg and TNF-Tg/Bad-/- mice
Synovitis											Mean	SD	SEM	F-test	T-test
WT (n=5)	0	0	0	0	0						0	0	0
KO (n=5)	0	0	0	0	0						0	0	0
Tg-WT (n=10)	2	3	2	2	2	1	2	2	1	1	1.8	0.632456	0.2
Tg-Bad-/- (n=10)	2	1	2	4	3	3	4	3	2	2	2.6	0.966092	0.305505	0.222868	0.0418611
Pannus fromation											Mean	SD	SEM	F-test	T-test
WT (n=5)	0	0	0	0	0						0	0	0
KO (n=5)	0	0	0	0	0						0	0	0
Tg-WT (n=10)	1	2	2	1	2	1	1	1	1	1	1.3	0.483046	0.152753
Tg-Bad-/- (n=10)	1	2	2	3	2	2	3	2	1	1	1.9	0.737865	0.233333	0.222868	0.0452705
Cartilage/bone destruction											Mean	SD	SEM	F-test	T-test
WT (n=5)	0	0	0	0	0						0	0	0
KO (n=5)	0	0	0	0	0						0	0	0
Tg-WT (n=10)	1	2	2	1	1	1	1	1	1	1	1.2	0.421637	0.133333
Tg-Bad-/- (n=10)	1	1	2	3	3	2	3	2	1	1	1.9	0.875595	0.276887	0.0403803	0.0403413

## Sheet: Figure 6D
Quantification of the number of pBAD(S136) positive cells per field
	Control	TNF-Tg
n=3 per group	4	34
	5	20
	7	25
Mean	5.33333	26.3333
SD	1.52753	7.0946
SEM	0.881917	4.09607
F-test		0.0886076
T-test		0.00742711

## Sheet: Figure 6G
Apoptotic synovial macrophages analyzed by flow cytometry
	TNF-Tg	TNF-Tg/Bad-/-
n=6	17.43	4.1
	19.68	3.66
	16.25	5.24
	18.11	3.79
	16.95	3.15
	17.44	6.04
Mean	17.6433	4.33
SD	1.17258	1.08977
SEM	0.478704	0.444897
F-test	0.876217
T-test	1.93442e-09
