# Supplementary material for: BAD inactivation exacerbates rheumatoid arthritis pathology by promoting survival of sublining macrophages
Source: eLife. 2020 Dec 3;9:e56309. doi: 10.7554/eLife.56309 (PMC7714394; doi:10.7554/eLife.56309)
Supplement: Figure 7—source data 1. [file elife-56309-fig7-data1.xlsx]

## Sheet: Figure 7D
Incidence and clinical scores of WT and Bad3SA/3SA mice in CIA model 58 13) and Bad3SA/3SA mice in CIA model
Day	WT (n=13)													score	SD	SEM	incidence
15	0	0	0	0	0	0	0	0	0	0	0	0	0	0	0	0	0
17	0	0	0	0	0	0	0	0	0	0	0	0	0	0	0	0	0
19	0	0	0	0	0	0	0	0	0	0	0	0	0	0	0	0	0
21	0	0	0	0	0	0	0	0	0	0	0	0	0	0	0	0	0
23	0	0	0	0	0	0	0	0	0	0	0	0	0	0	0	0	0
25	1	0	0	0	0	0	0	0	0	0	0	0	0	0.0769231	0.27735	0.0769231	7.7
27	3	0	0	0	0	0	0	0	0	0	0	0	0	0.230769	0.83205	0.230769	7.7
29	4	0	0	0	0	0	0	0	0	1	0	0	0	0.384615	1.1209	0.310881	15.4
31	7	0	0	0	0	0	0	0	0	1	3	0	0	0.846154	2.03495	0.564394	23
33	9	0	0	0	0	0	0	0	0	1	4	0	0	1.07692	2.62874	0.72908	23
35	9	0	0	0	1	0	0	0	0	1	6	0	0	1.30769	2.83974	0.787601	30.7
37	9	0	0	0	1	0	0	0	0	1	6	1	0	1.38462	2.8148	0.780684	38.5
39	9	0	0	0	3	0	0	1	0	1	6	3	0	1.76923	2.83296	0.785721	46
41	9	0	0	0	4	0	0	3	0	1	7	5	0	2.23077	3.11325	0.863459	46
43	9	0	0	0	4	0	0	4	0	1	7	6	0	2.38462	3.22848	0.895419	46
45	9	0	0	0	4	0	0	6	0	1	7	6	0	2.53846	3.35697	0.931055	46
47	9	0	0	0	4	0	1	6	0	1	7	6	0	2.61538	3.30501	0.916644	53.8
49	9	0	0	0	4	0	1	6	0	1	7	6	0	2.61538	3.30501	0.916644	53.8
51	9	0	0	0	3	2	2	6	0	1	7	6	0	2.76923	3.16633	0.878182	61.5
53	9	0	0	0	2	3	3	6	0	1	7	6	0	2.84615	3.15822	0.875933	61.5
55	9	0	0	0	2	1	3	7	0	2	7	6	0	2.84615	3.26206	0.904732	61.5
57	9	0	0	0	2	1	2	7	0	2	7	6	0	2.76923	3.26991	0.90691	61.5
59	9	0	0	0	2	1	1	8	0	3	7	6	0	2.84615	3.41189	0.946289	61.5
61	9	0	0	0	2	1	1	6	0	3	7	6	0	2.69231	3.19856	0.88712	61.5
63	9	0	0	0	2	1	1	6	0	3	7	6	0	2.69231	3.19856	0.88712	61.5
Day	Bad 3SA/3SA (n=14)														score	SD	SEM	incidence	MWU-test
15	0	0	0	0	0	0	0	0	0	0	0	0	0	0	0	0	0	0
17	0	0	0	0	0	0	0	0	0	0	0	0	0	0	0	0	0	0
19	0	0	0	0	0	0	0	0	0	0	0	0	0	0	0	0	0	0
21	0	0	0	0	0	0	0	0	0	0	0	0	0	0	0	0	0	0
23	0	0	0	0	0	0	0	0	0	0	0	0	0	0	0	0	0	0
25	0	0	0	0	0	0	0	0	0	0	0	0	0	0	0	0	0	0
27	0	0	0	0	0	0	0	0	2	0	0	0	0	0	0.142857	0.534522	0.142857	7.1
29	0	0	0	0	0	0	0	0	4	0	0	0	0	0	0.285714	1.06904	0.285714	7.1
31	0	0	0	0	0	0	0	0	4	0	0	0	0	0	0.285714	1.06904	0.285714	7.1
33	0	0	0	0	0	0	0	0	4	0	0	0	0	0	0.285714	1.06904	0.285714	7.1
35	0	0	0	0	0	0	0	0	4	0	0	0	0	1	0.357143	1.08182	0.289128	14.3	0.458
37	0	0	0	0	0	0	0	0	4	0	0	0	0	1	0.357143	1.08182	0.289128	14.3	0.28
39	0	0	0	0	0	0	0	0	4	0	0	0	0	1	0.357143	1.08182	0.289128	14.3	0.155
41	0	0	0	1	0	0	0	0	4	0	0	0	0	2	0.5	1.16024	0.310087	21.4	0.185
43	0	0	0	1	0	0	0	0	4	0	0	0	0	2	0.5	1.16024	0.310087	21.4	0.185
45	0	0	0	1	0	0	0	0	4	0	0	0	0	2	0.5	1.16024	0.310087	21.4	0.169
47	0	0	0	1	0	0	0	0	3	0	0	0	0	2	0.428571	0.937614	0.250588	21.4	0.094
49	0	0	0	1	0	0	0	0	3	0	0	0	0	1	0.357143	0.841897	0.225007	21.4	0.085
51	0	0	0	1	0	0	0	0	3	0	0	0	0	1	0.357143	0.841897	0.225007	21.4	0.033
53	0	0	0	1	0	0	0	0	3	0	0	0	0	1	0.357143	0.841897	0.225007	21.4	0.029
55	0	0	0	1	0	0	0	0	2	0	0	0	0	1	0.285714	0.61125	0.163363	21.4	0.025
57	0	0	0	1	0	0	0	0	2	0	0	0	0	1	0.285714	0.61125	0.163363	21.4	0.029
59	0	0	0	1	0	0	0	0	2	0	0	0	0	1	0.285714	0.61125	0.163363	21.4	0.033
61	0	0	0	1	0	0	0	0	2	0	0	0	0	1	0.285714	0.61125	0.163363	21.4	0.033
63	0	0	0	1	0	0	0	0	2	0	0	0	0	1	0.285714	0.61125	0.163363	21.4	0.033

## Sheet: Figure 7F
Evaluation of synovitis, pannus and erosion of ankle joints from WT and Bad3SA/3SA mice in CIA model
WT (n=13)															Mean	SD	SEM
synovitis	3	0	0	1	1	1	2	3	0	0	3	3	0		1.30769	1.31559	0.364878
pannus fromation	3	0	0	0	0	0	1	3	0	0	3	3	0		1	1.41421	0.392232
cartilage/bone destruction	3	0	0	0	0	0	1	3	0	0	3	3	0		1	1.41421	0.392232
Bad3SA/3SA (n=14)															Mean	SD	SEM	F-test	T-test
synovitis	0	0	0	1	0	0	0	0	2	0	0	0	0	2	0.357143	0.744946	0.199095	0.0521246	0.0280143
pannus fromation	0	0	0	0	0	0	0	0	1	0	0	0	0	0	0.0714286	0.267261	0.0714286	5.3338e-07	0.0369117
cartilage/bone destruction	0	0	0	0	0	0	0	0	1	0	0	0	0	0	0.0714286	0.267261	0.0714286	5.3338e-07	0.0369117

## Sheet: Figure 7I
Quantification of the number of total macrophage and cleaved Casp-3 positive macrophage per field in the ankle joint sections of WT and Bad3SA/3SA mice in CIA model
Cleaved casp-3/F4/80 double positive cells						F4/80 positive cells
	n=6 per group	WT	Bad3SA/3SA				WT	Bad3SA/3SA
		5	11			n=6 per group	52	27
		10	12				41	46
		11	20				70	30
		6	15				64	23
		6	13				48	36
		9	16				59	24
	Mean	7.83333	14.5			Mean	55.6667	31
	SD	2.48328	3.27109			SD	10.7083	8.7178
	SEM	1.01379	1.33542			SEM	4.37163	3.55903
	F-test		0.560015			F-test		0.662756
	T-test		0.00261693			T-test		0.00138666
