# Supplementary material for: BAD inactivation exacerbates rheumatoid arthritis pathology by promoting survival of sublining macrophages
Source: eLife. 2020 Dec 3;9:e56309. doi: 10.7554/eLife.56309 (PMC7714394; doi:10.7554/eLife.56309)
Supplement: Figure 8—figure supplement 1—source data 1. [file elife-56309-fig8-figsupp1-data1.xlsx]

## Sheet: Figure 8-figure supplement 1B
Double staining of BAD and cell markers in RA synovium
	Total cell number	BAD+ cell number	% of BAD+ cell
CD3	22	19	86.3636
	32	32	100
	23	22	95.6522
		Mean	94.0053
CD20	24	20	83.3333
	21	21	100
	8	8	100
		Mean	94.4444
CD68	24	21	87.5
	34	34	100
	26	26	100
		Mean	95.8333
Vimentin	18	14	77.7778
	20	17	85
	24	22	91.6667
		Mean	84.8148
