# Supplementary material for: BAD inactivation exacerbates rheumatoid arthritis pathology by promoting survival of sublining macrophages
Source: eLife. 2020 Dec 3;9:e56309. doi: 10.7554/eLife.56309 (PMC7714394; doi:10.7554/eLife.56309)
Supplement: Figure 8—source data 1. [file elife-56309-fig8-data1.xlsx]

## Sheet: Figure 8B
Quantification of pBAD(S99)-positive cells per field in the synovial specimen sections of patients with OA and RA
	OA	RA
n=5 per group	4	33
	5	26
	1	12
	2	24
	2	18
Mean	2.8	22.6
SD	1.64317	7.98749
SEM	0.734847	3.57211
F-test		0.00962317
T-test		0.00440821

## Sheet: Figure 8D
Quantification of the percentage of pBAD(S99)-positive cells in total cells per field of different cell types
		Total cells	p-BAD+ cells	Ratio	%
CD68+ cells (n=5 per group)	1	85	80	0.941176	94.1176
	2	59	57	0.966102	96.6102
	3	84	80	0.952381	95.2381
	4	38	34	0.894737	89.4737
	5	27	26	0.962963	96.2963
		Total cells	p-BAD+ cells	Ratio	%
CD20+ cells (n=5 per group)	1	31	1	0.0322581	3.22581
	2	16	0	0	0
	3	63	1	0.015873	1.5873
	4	7	0	0	0
	5	25	1	0.04	4
		Total cells	p-BAD+ cells	Ratio	%
CD3+ cells (n=5 per group)	1	42	3	0.0714286	7.14286
	2	82	6	0.0731707	7.31707
	3	42	4	0.0952381	9.52381
	4	70	5	0.0714286	7.14286
	5	46	2	0.0434783	4.34783
		Total cells	p-BAD+ cells	Ratio	%
Vimen+ cells (n=5 per group)	1	79	3	0.0379747	3.79747
	2	99	3	0.030303	3.0303
	3	65	4	0.0615385	6.15385
	4	73	2	0.0273973	2.73973
	5	86	2	0.0232558	2.32558
